# Supplementary material for: Heterogeneous HIV Testing Preferences in an Urban Setting in Tanzania: Results from a Discrete Choice Experiment
Source: PubMed Central journal article supplement (PMC3958474; doi:10.1371/journal.pone.0092100), 2014-03-18
Supplement: pone.0092100.s001.pdf [file pone.0092100.s001.pdf]

HCT-DCE v50, created 10 Sep 2012 ►

Tracking #: \_ \_ \_ \_

Survey facepage for

**DCE I - English**

8 section(s):

1. **Attitudes** [p. 2]
2. **HIV Testing** [p. 6]
3. **HIV Risk** [p. 8]
4. **Knowledge & Stigma** [p. 9]
5. **Relationship** [p. 10]
6. **Health** [p. 11]
7. **Sociodemographics** [p. 12]
8. **Socioeconomics** [p. 13]

Fill at time of data collection:

|                                                                                                                                                                                  |
|----------------------------------------------------------------------------------------------------------------------------------------------------------------------------------|
| <b>Interviewer:</b><br>_____<br><b>Participant ID:</b> ____ - ____ - ____<br><b>Interview #:</b> _____<br><b>Date of data collection:</b> (YYYY / MM / DD)<br>____ / ____ / ____ |
|----------------------------------------------------------------------------------------------------------------------------------------------------------------------------------|

Fill before data entry:

|                                                                      |
|----------------------------------------------------------------------|
| <b>Tracking #:</b> ____<br><b>Confirmation #:</b> ____ - ____ - ____ |
|----------------------------------------------------------------------|

Status (check when complete):

|                                                                                                                                            |
|--------------------------------------------------------------------------------------------------------------------------------------------|
| <input type="checkbox"/> <b>Quality assurance</b><br><input type="checkbox"/> <b>Data entry</b><br><input type="checkbox"/> <b>Scanned</b> |
|--------------------------------------------------------------------------------------------------------------------------------------------|

Notes:

|  |
|--|
|  |
|--|

ef 02 9f 81 b8

**Begin on next page →**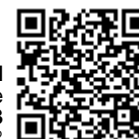

DCE I  
Facepage  
Page 1 of 13

ef029f81b850d61fd9c40c8040fff17f522d9402

**Ostermann et al. - Heterogeneous HIV testing preferences in an urban setting in Tanzania: Results from a Discrete Choice Experiment**

q:4j3 **Supplemental Survey**

1) Participant ID

q:4io \_\_\_\_\_ 4

Or: DK / RF / MI [strike across for NA]

2) DCE completed on ...

q:4ip Mark one:

- a) Paper  
 b) iPad

Or: DK / RF / MI [strike across for NA]

3) Interview ID:

q:4iq \_\_\_\_\_ 4

Or: DK / RF / MI [strike across for NA]

q:4h4 **Attitudes**

**🔊** Now we are going to ask you questions about HIV testing in and around Moshi. Even if you don't think you would ever test for HIV, we would like you to consider the following questions as if you actually decided to get tested.

q:4h6

4) Do you know of a place where people can go to get tested for the AIDS virus?

q:4f6 Mark one:

- a) Yes  
 b) No

Or: DK / RF / MI [strike across for NA]

5) IF YES:  
Please tell me all of the places in Moshi that you know of that offer HIV testing.

q:4h8

Mark all that apply (do NOT read to respondent):

- a) Angaza  
 b) C.C.P.  
 c) KCMC  
 d) Kiboroloni  
 e) Kilema  
 f) Kiusa  
 g) Kiwakkuki  
 h) Majengo  
 i) Mawenzi  
 j) Pasua  
 k) Rainbow  
 l) Siima

 m) Other \_\_\_\_\_ 4

Or: DK / RF / MI [strike across for NA]

6) Now I will read to you a list of places in Moshi that offer HIV testing. Of these places, where would you prefer to test?

q:4g7

Mark one (READ responses aloud):

- a) KCMC  
 b) Mawenzi Hospital  
 c) Kiwakkuki  
 d) Angaza  
 e) Kiusa  
 f) Rainbow Centre  
 g) C.C.P.  
 h) Kiboroloni Dispensary  
 i) Majengo Health Centre  
 j) Pasua Health Centre  
 k) Siima

 l) Other \_\_\_\_\_ 4

Or: DK / RF / MI [strike across for NA]

➡  If clients states he/she will NEVER TEST, mark NA and skip to #10, p. 3 (q:4ii)

q:4i1

7) You said you would prefer to test at [...]. Have you previously tested there for HIV?

q:4g8

Mark one:

- a) Yes  
 b) No

Or: DK / RF / MI [strike across for NA]

8) Why would you prefer to test at this place?

q:4g9

\_\_\_\_\_ 4  
Or: DK / RF / MI [strike across for NA]

9) INTERVIEWER RECODE.

q:4h9

Mark all that apply (do NOT read to respondent):

- a) Anonymity  
 b) Closest facility  
 c) Accuracy / confidence in the result  
 d) Counselor characteristics  
 e) Medications available  
 f) Other services provided  
 g) Testing times  
 h) Other

Or: DK / RF / MI [strike across for NA]

**Continue on next page →**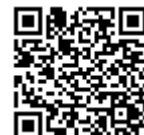

DCE I  
 Attitudes  
 Page 2 of 13

ef029f81b850d61fd9c40c8040fff17f522d9402

HCT-DCE v50, created 10 Sep 2012 ►

Tracking #: \_ \_ \_ \_

**10)** If testing was offered at home, and a counselor from [...preferred place] came to your home for counseling and testing, would you prefer to test ...  
q:4jii

Mark one:

- a) At your home  
 b) [ ... at the preferred testing place ]

Or: DK / RF / MI [strike across for NA]

➡  If clients states he/she will NEVER TEST, mark NA and skip to #25, p. 4 (q:4gw)

q:4hb

**11)** On which day of the week, Monday through Sunday, would you prefer to test?

q:4j4

Mark one (do NOT read to respondent):

- a) Monday  
 b) Tuesday  
 c) Wednesday  
 d) Thursday  
 e) Friday  
 f) Saturday  
 g) Sunday  
 h) Not important

Or: DK / RF / MI [strike across for NA]

**12)** At what time of the day would you prefer to test?

q:4j5

Mark one (do NOT read to respondent):

- a) 6 - 8am  
 b) 8 - 10am  
 c) 10am - 4pm  
 d) 4 - 6pm  
 e) 6 - 8pm  
 f) 8pm - 6am  
 g) Not important

Or: DK / RF / MI [strike across for NA]

**13)** Would you prefer ...

q:4gc

Mark one:

- a) to make an appointment before going for testing  
 b) to just go there

Or: DK / RF / MI [strike across for NA]

**14)** Would you prefer ...

q:4gb

Mark one:

- a) to have someone escort you to go for HIV testing  
 b) go for HIV testing on your own

Or: DK / RF / MI [strike across for NA]

**15)** Would you prefer to test ...

q:4gn

Mark one:

- a) At a place where you are asked for your name  
 b) At a place where you do not have to give your name?  
 c) Not important

Or: DK / RF / MI [strike across for NA]

**16)** How much time do you think it takes to test for HIV, from the moment you enter the testing place until you are finished?

q:4gq

Or: DK / RF / MI [strike across for NA]

**17)** Would you prefer ...

q:4gi

Mark one:

- a) A counselor who is older than you  
 b) A counselor who is younger than you  
 c) A counselor who is the same age as you  
 d) Not important

Or: DK / RF / MI [strike across for NA]

**18)** Would you prefer ...

q:4gj

Mark one:

- a) A male counselor  
 b) A female counselor  
 c) Not important

Or: DK / RF / MI [strike across for NA]

**19)** Would you prefer ...

q:4gk

Mark one:

- a) A counselor who knows you  
 b) A counselor who doesn't know you  
 c) Not important

Or: DK / RF / MI [strike across for NA]

**20)** Would you prefer to be tested for HIV by ...

q:4gl

Mark one:

- a) A doctor  
 b) A nurse  
 c) An HIV counselor  
 d) Not important

Or: DK / RF / MI [strike across for NA]

Continue on next page →

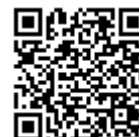

DCE I  
Attitudes  
Page 3 of 13

ef029f81b850d61fd9c40c8040fff17f522d9402

**21)** Let's say you have already tested and you are going to test again. Would you prefer ...

q:4gm

Mark one:

- a) The same counselor who counseled you last time  
 b) A different counselor  
 c) Not important

Or: DK / RF / MI [strike across for NA]

**22)** Would you prefer to get tested for HIV alone or together with someone else?

q:4gg

Mark one:

- a) Alone  
 b) With someone else

Or: DK / RF / MI [strike across for NA]

**23)** IF 'WITH SOMEONE ELSE':  
 With whom would you prefer to test?

q:4gh

Mark one (do NOT read to respondent):

- a) Spouse  
 b) Sexual partner  
 c) Child(ren)  
 d) Other family member(s)  
 e) Entire family  
 f) Friend  
 g) Other \_\_\_\_\_

Or: DK / RF / MI [strike across for NA]

**24)** Would you prefer to receive the result from the counselor right away, or to get a phone call later with the result?

q:4gs

Mark one:

- a) From the counselor  
 b) Later by phone

Or: DK / RF / MI [strike across for NA]

**25)** In your opinion, how accurate are HIV tests [in your preferred testing site]?

q:4gw

Mark one (READ responses aloud):

- a) Completely accurate  
 b) Mostly accurate  
 c) Inaccurate

Or: DK / RF / MI [strike across for NA]

**26)** Do you think there are differences in the accuracy of the test between HIV testing centres?

q:4it

Mark one (READ responses aloud):

- a) You think yes  
 b) You think no

Or: DK / RF / MI [strike across for NA]

**27)** If you found out that you are HIV positive, which of the following would you prefer?

q:4gv

Mark one (READ responses aloud):

- a) You inform your partner that you have HIV.  
 b) The HIV testing center assists you with informing your partner.  
 c) You prefer not to inform your partner.

Or: DK / RF / MI [strike across for NA]

**28)** If you test for HIV and don't tell anyone, how likely is it that some other person will find out that you tested?

q:4gt

Mark one (READ responses aloud):

- a) Very likely  
 b) Somewhat likely  
 c) Not likely

Or: DK / RF / MI [strike across for NA]

**29)** If an oral HIV test was offered in Tanzania, would you be ...

q:4gy

Mark one:

- a) willing to test  
 b) not willing to test

Or: DK / RF / MI [strike across for NA]

**30)** Like persons with diabetes who can test themselves, if a self-test was available, where you can test for HIV yourself and get the results in the privacy of your own home, would you be ...

q:4gz

Mark one:

- a) willing to test  
 b) not willing to test

Or: DK / RF / MI [strike across for NA]

**31)** When, if ever, do you think you will test for HIV [next time]?

q:4h0

Mark one (READ responses aloud):

- a) Within the next 3 months  
 b) Within the next 1 year  
 c) More than 1 year from now  
 d) Never

Or: DK / RF / MI [strike across for NA]

➔  If NEVER, skip to #34, p. 5 (q:4h3)

q:4ib

**Continue on next page →**

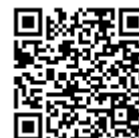

DCE I  
 Attitudes  
 Page 4 of 13

ef029f81b850d61fd9c40c8040fff17f522d9402

**32)** Would you prefer to receive HIV counseling and testing when you go to see a doctor for other reasons, or would you prefer to just test for HIV?  
q:4i4

Mark one:

- a) While seeing a doctor for other reasons  
 b) HIV testing only

Or: DK / RF / MI [strike across for NA]

**33)** Would you prefer to receive HIV counseling and testing when you get tested for Malaria or would you prefer to just test for HIV?  
q:4gd

Mark one:

- a) While testing for malaria  
 b) HIV testing only

Or: DK / RF / MI [strike across for NA]

**34)** If you had to choose, what would you consider most important in deciding where to test for HIV?  
q:4h3

Mark one (READ responses aloud):

- a) Privacy and confidentiality  
 b) Accuracy of the test  
 c) Access to testing and convenience

Or: DK / RF / MI [strike across for NA]

 You said it takes time to test, and testing may interfere with your normal activities. If someone asked you to change your plans for tomorrow in order to test for HIV, it may be best if they compensate you for your time.  
q:4iy

**35)** If someone were to offer you TSH 5,000 to test for HIV tomorrow, would you test?  
q:4hw

Mark one:

- a) Yes  
 b) No

Or: DK / RF / MI [strike across for NA]

  If NO skip to #37, p. 5 (q:4hy)

q:4i0

**36)** If someone were to offer you TSH 2,000 to test for HIV tomorrow, would you test?  
q:4hx

Mark one:

- a) Yes  
 b) No

Or: DK / RF / MI [strike across for NA]

  If YES, skip to "HIV Testing", p. 6 (q:4ex)

q:4hz

**37)** If someone were to offer you TSH 10,000 to test for HIV tomorrow, would you test?  
q:4hy

Mark one:

- a) Yes  
 b) No

Or: DK / RF / MI [strike across for NA]

  If YES, skip to "HIV Testing", p. 6 (q:4ex)

q:4hz

**38)** If NO:  
How much would they have to offer so that you would test for HIV tomorrow?  
q:4h1

Or: DK / RF / MI [strike across for NA]

4

Continue on next page →

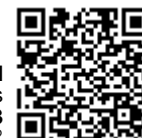

DCE I  
Attitudes  
Page 5 of 13

ef029f81b850d61fd9c40c8040fff17f522d9402

HCT-DCE v50, created 10 Sep 2012 ▶

Tracking #: \_ \_ \_ \_

q:4ex **HIV Testing****39)** In your lifetime, how many times have you been tested for HIV?

q:4ad

# \_\_\_\_\_ 4

Or: DK / RF / MI [strike across for NA]

➡  If answer is 0 or NEVER, skip to #54, p. 7 (q:4b0)

q:4fp

**40)** Have you ever tested at a hospital or health centre?

q:4j8

Mark one: a) Yes b) No

Or: DK / RF / MI [strike across for NA]

**41)** Have you ever tested at a community VCT centre?

q:4j9

Mark one: a) Yes b) No

Or: DK / RF / MI [strike across for NA]

**42)** Have you ever tested during mobile VCT?

q:4ja

Mark one: a) Yes b) No

Or: DK / RF / MI [strike across for NA]

**43)** Have you ever tested anywhere else?

q:4jb

Mark one: a) No b) Other \_\_\_\_\_ 4

Or: DK / RF / MI [strike across for NA]

**44)** WOMEN ONLY:  
Have you ever tested for HIV as part of PMTCT?

q:4iv

Mark one: a) Yes b) No

Or: DK / RF / MI [strike across for NA]

**45)** Did you test for HIV during the National Campaign in 2007?

q:4fh

Mark one: a) Yes b) No

Or: DK / RF / MI [strike across for NA]

**46)** In which year and month did you test the last time?

q:4ae

Year: \_\_\_\_ / Month: \_\_\_\_ / Day: \_\_\_\_

Or: DK / RF / MI [strike across for NA]

**47)** Was this in Moshi or elsewhere?

q:4g4

Mark one: a) Moshi b) Other \_\_\_\_\_ 4

Or: DK / RF / MI [strike across for NA]

**48)** Where did you test?

q:4fg

Mark one (do NOT read to respondent): a) Angaza b) C.C.P. c) KCMC d) Kiboroloni e) Kilema f) Kiusa g) Kiwakkuki h) Majengo i) Mawenzi j) Pasua k) Rainbow l) Siima m) Other \_\_\_\_\_ 4

Or: DK / RF / MI [strike across for NA]

**49)** INTERVIEWER RECODE.

q:4hc

Mark one (do NOT read to respondent): a) Dispensary b) Health center c) Hospital d) Community VCT center e) Mobile VCT f) Other \_\_\_\_\_ 4

Or: DK / RF / MI [strike across for NA]

Continue on next page →

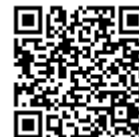

DCE I  
HIV Testing  
Page 6 of 13

ef029f81b850d61fd9c40c8040ffff17f522d9402

HCT-DCE v50, created 10 Sep 2012 ▶

Tracking #: \_ \_ \_ \_

- 50)** The last time you tested ...  
q:4j6
- Mark one (READ responses aloud):
- a) Did you ask for the test yourself?
  - b) Was it required because you were pregnant?
  - c) Was it required for other reasons?
  - d) Was it suggested that you test and you accepted?
- Or: DK / RF / MI [strike across for NA]

- 51)** What was the test result?  
q:4is
- Mark one:
- a) HIV+
  - b) HIV-
- Or: DK / RF / MI [strike across for NA]

- 52)** Have you ever told your husband/wife/partner your test result?  
q:4ag
- Mark one:
- a) Yes
  - b) No
- Or: DK / RF / MI [strike across for NA]

- 53)** Have you told anyone else your test result?  
q:4i2
- Mark one:
- a) Yes
  - b) No
- Or: DK / RF / MI [strike across for NA]

- 54)** Has your husband/wife/partner ever tested for HIV?  
q:4b0
- Mark one:
- a) Yes
  - b) No
  - c) Has no partner
- Or: DK / RF / MI [strike across for NA]

- 55)** IF YES:  
What was your husband's/wife's test result?  
q:4ah
- Mark one:
- a) HIV+
  - b) HIV-
- Or: DK / RF / MI [strike across for NA]

- 56)** IF HIV-  
Of all the adults in this household, have any of them tested HIV positive?  
q:4id
- Mark one:
- a) Yes
  - b) No
- Or: DK / RF / MI [strike across for NA]

- 57)** How many children under the age of 18 live in this household?  
q:4g0
- # \_\_\_\_\_ 41
- Or: DK / RF / MI [strike across for NA]

- 58)** Of all the children in this household, how many have tested for HIV?  
q:4i9
- # \_\_\_\_\_ 41
- Or: DK / RF / MI [strike across for NA]

- 59)** IF 1 OR MORE:  
Have any of these children tested HIV positive?  
q:4ic
- Mark one:
- a) Yes
  - b) No
- Or: DK / RF / MI [strike across for NA]

- ➡  If respondent has tested skip to "HIV Risk", p. 8 (q:4fi)  
q:4ir

- 60)** What are the reasons you have never tested for HIV?  
q:4ez
- Mark all that apply (do NOT read to respondent):
- a) Never thought of getting tested
  - b) Don't think I'm at risk
  - c) Afraid of needle
  - d) Don't have time for testing
  - e) Nervous to get results
  - f) Worried about partner's reaction
  - g) Worried about other people knowing
  - h) Other \_\_\_\_\_ 41
- Or: DK / RF / MI [strike across for NA]

- 61)** What, if anything, would make you get tested for HIV?  
q:4if
- \_\_\_\_\_ 41
- Or: DK / RF / MI [strike across for NA]

Continue on next page →

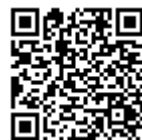

DCE I  
HIV Testing  
Page 7 of 13

ef029f81b850d61fd9c40c8040fff17f522d9402

HCT-DCE v50, created 10 Sep 2012 ▶

Tracking #: \_ \_ \_ \_

q:4fi **HIV Risk****62)** In total, with how many different people have you had sexual intercourse in your lifetime?

q:4es

# \_\_\_\_\_

Or: DK / RF / MI [strike across for NA]

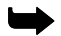

- If NEVER, mark N/A and skip to #68, p. 8 (q:4ey)

q:4fs

**63)** In total, with how many different people have you had sexual intercourse in the last 12 months?

q:4er

# \_\_\_\_\_

Or: DK / RF / MI [strike across for NA]

**64)** Of all the sexual partners you have ever had, do you think that any of them have HIV?

q:4fa

Mark one (READ responses aloud):

- a) You think yes
- b) You think no

Or: DK / RF / MI [strike across for NA]

**65)** Of all the sexual partners you have ever had, have any of them died?

q:4fb

Mark one:

- a) Yes
- b) No

Or: DK / RF / MI [strike across for NA]

**66)** During the last 12 months, have you had a disease which you got through sexual contact?

q:4ev

Mark one:

- a) Yes
- b) No

Or: DK / RF / MI [strike across for NA]

**67)** Have you ever given or received gifts or money for sex?

q:4fj

Mark one:

- a) Yes
- b) No

Or: DK / RF / MI [strike across for NA]

**68)** Which of these two statements do you agree with more?

q:4ey

Mark one (READ responses aloud):

- a) I believe that I am living with HIV
- b) I believe that I do not have HIV

Or: DK / RF / MI [strike across for NA]

**69)** If you were to test for HIV today, what do you think are the chances that you would be found to be HIV infected?

q:4g2

Mark one (READ responses aloud):

- a) None
- b) Almost none
- c) Less than half
- d) About half
- e) More than half

Or: DK / RF / MI [strike across for NA]

**Continue on next page →**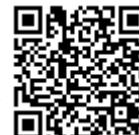DCE I  
HIV Risk  
Page 8 of 13

ef029f81b850d61fd9c40c8040ffff17f522d9402



q:4f8 **HIV Knowledge****70)** Can people get the AIDS virus from mosquito bites?

q:4d8

Mark one:

- a) Yes  
 b) No

Or: DK / RF / MI [strike across for NA]

**71)** Can people reduce their chance of getting the AIDS virus by using a condom every time they have sex?

q:4d9

Mark one:

- a) Yes  
 b) No

Or: DK / RF / MI [strike across for NA]

**72)** Can people get the AIDS virus by sharing food with a person who has AIDS?

q:4da

Mark one:

- a) Yes  
 b) No

Or: DK / RF / MI [strike across for NA]

**73)** Can people get the AIDS virus because of witchcraft or other supernatural means?

q:4db

Mark one:

- a) Yes  
 b) No

Or: DK / RF / MI [strike across for NA]

**74)** Is it possible for a healthy-looking person to have the AIDS virus?

q:4dc

Mark one:

- a) Yes  
 b) No

Or: DK / RF / MI [strike across for NA]

**75)** Is it possible for the long term partner of an HIV positive person to be HIV negative?

q:4hf

Mark one:

- a) Yes  
 b) No

Or: DK / RF / MI [strike across for NA]

**76)** Can the virus that causes AIDS be transmitted from a mother to her baby ...

q:4dd

Mark all that apply (read ONE-by-ONE):

- a) during pregnancy?  
 b) during delivery?  
 c) by breastfeeding?  
 d) None of the above

Or: DK / RF / MI [strike across for NA]

**77)** Are there any special drugs that a doctor or a nurse can give to a woman infected with the AIDS virus to reduce the risk of transmission to the baby?

q:4de

Mark one:

- a) Yes  
 b) No

Or: DK / RF / MI [strike across for NA]

**78)** Would you buy fresh vegetables from a shopkeeper or vendor if you knew that this person had the AIDS virus, but if s/he was not sick?

q:4d3

Mark one:

- a) Yes  
 b) No

Or: DK / RF / MI [strike across for NA]

**79)** If a member of your family got infected with the AIDS virus, would you want it to remain a secret or not?

q:4d4

Mark one:

- a) Yes, remain a secret  
 b) No

Or: DK / RF / MI [strike across for NA]

**80)** If a member of your family became sick with AIDS, would you be willing to care for her or him in your own household?

q:4d5

Mark one:

- a) Yes  
 b) No

Or: DK / RF / MI [strike across for NA]

**81)** In your opinion, if a female teacher has the AIDS virus but is not sick, should she be allowed to continue teaching in the school?

q:4d6

Mark one:

- a) Should be allowed  
 b) Should not be allowed

Or: DK / RF / MI [strike across for NA]

**Continue on next page →**DCE I  
Knowledge & Stigma  
Page 9 of 13

ef029f81b850d61fd9c40c8040ffff17f522d9402

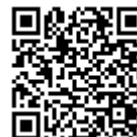

HCT-DCE v50, created 10 Sep 2012 ▶

Tracking #: \_ \_ \_ \_

q:4fk **Interviewer: Women only.****Relationship**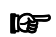

Now I will ask you some sensitive questions. I want to remind you that your answers will remain confidential and you can refuse to answer any questions.

q:4i5

**82)** Are you pregnant?

q:4f3

Mark one:

- a) Yes  
 b) No

Or: DK / RF / MI [strike across for NA]

**83)** Can you say no to your husband/partner if you do not want to have sexual intercourse?

q:4dh

Mark one:

- a) Yes  
 b) No

Or: DK / RF / MI [strike across for NA]

**84)** Could you ask your husband/partner to use a condom if you wanted him to?

q:4di

Mark one:

- a) Yes  
 b) No

Or: DK / RF / MI [strike across for NA]

**85)** Does your husband/partner ever ...

q:4dk

Mark all that apply (read ONE-by-ONE):

- a) slap you?  
 b) kick you, drag you or beat you up?  
 c) physically force you to have sexual intercourse with him even when you did not want to?  
 d) None of the above

Or: DK / RF / MI [strike across for NA]

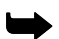

- If c) is YES, skip next question.

q:4ft

**86)** At any time in your life, as a child or as an adult, has anyone ever forced you in any way to have sexual intercourse or perform any other sexual acts?

q:4do

Mark one:

- a) Yes  
 b) No

Or: DK / RF / MI [strike across for NA]

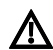

IF YES to either of the last 2 questions, inform the client that she may contact: KWIECO at 027 275 1121.

q:4i6

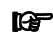

If you encounter problems like those you mentioned, you may seek help or counseling from KWIECO, an organization that helps with issues related to gender violence. The organization is located in the Lucas Construction Building, next to MDC, Arusha Road, in Moshi Town.

q:4iz

**Continue on next page →**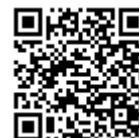

DCE I  
 Relationship  
 Page 10 of 13

ef029f81b850d61fd9c40c8040fff17f522d9402

q:4ew **Health**

- 87)** In general, would you say your health is:  
q:4aw Mark one (READ responses aloud):
- a) Excellent
  - b) Very good
  - c) Good
  - d) Fair
  - e) Poor
- Or: DK / RF / MI [strike across for NA]

- 88)** When was the last time you visited a health facility for care for yourself?  
q:4i3 Mark one:
- a) In the last 12 months
  - b) 1-2 years ago
  - c) 3-5 years ago
  - d) More than 5 years ago
- Or: DK / RF / MI [strike across for NA]

- 89)** Were you offered HIV testing?  
q:4g6 Mark one:
- a) Yes
  - b) No
- Or: DK / RF / MI [strike across for NA]

- 90)** Did you give a blood sample?  
q:4e2 Mark one:
- a) Yes
  - b) No
- Or: DK / RF / MI [strike across for NA]

- 91)** Within the last 3 months, have you had any of the following?  
q:4fu Mark all that apply (read ONE-by-ONE):
- a) Fever
  - b) Cough
  - c) Coughing up blood
  - d) Sweats at night soaking the sheets
  - e) Diarrhea
  - f) Genital ulcers/discharge
  - g) Rash
  - h) None of the above
- Or: DK / RF / MI [strike across for NA]

- 92)** Have you ever been treated for tuberculosis?  
q:4fe Mark one:
- a) Yes
  - b) No
- Or: DK / RF / MI [strike across for NA]

- 93)** How often did you have a drink containing alcohol in the past year?  
q:4fv Mark one (READ responses aloud):

- a) Never
  - b) Monthly or less
  - c) 2-4 times per month
  - d) 2-3 times per week
  - e) 4 or more times per week
- Or: DK / RF / MI [strike across for NA]

- ➡  If NEVER, skip to next section.  
q:4fy

- 94)** How many drinks did you have on a typical day when you were drinking in the past year?  
q:4fw Mark one (READ responses aloud):
- a) 1 or 2
  - b) 3 or 4
  - c) 5 or 6
  - d) 7 to 9
  - e) 10 or more
- Or: DK / RF / MI [strike across for NA]

- 95)** How often did you have six or more drinks on one occasion during the past year?  
q:4fx Mark one (READ responses aloud):
- a) Never
  - b) Less than monthly
  - c) Monthly
  - d) Weekly
  - e) Daily or almost daily
- Or: DK / RF / MI [strike across for NA]

Continue on next page →

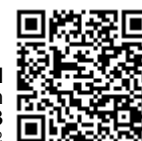

DCE I  
Health  
Page 11 of 13

ef029f81b850d61fd9c40c8040fff17f522d9402

q:4fm **Demographics**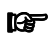

Now I will finish the survey by asking you some simple questions that are not related to HIV or HIV testing.

q:4ig

**96)** Gender

q:4aa

Mark one:

- a) Male  
 b) Female

Or: DK / RF / MI [strike across for NA]

**97)** How old were you at your last birthday?

q:4dy

# \_\_\_\_\_

Or: DK / RF / MI [strike across for NA]

**98)** What is your relationship to the head of the household?

q:4dp

Mark one:

- a) Head of household  
 b) Wife / husband / partner  
 c) Son or daughter  
 d) Son-in-law or daughter-in-law  
 e) Brother or sister  
 f) Other relative  
 g) Not related

Or: DK / RF / MI [strike across for NA]

**99)** How long have you lived in Moshi?

q:4fd

Years: \_\_\_\_\_ / Months: \_\_\_\_\_

Or: DK / RF / MI [strike across for NA]

**100)** In the last 12 months, have you traveled away from your home community and slept away?

q:4ha

Mark one:

- a) Yes  
 b) No

Or: DK / RF / MI [strike across for NA]

**101)** Which of the following best describes your current employment status?

q:4ai

Mark one (READ responses aloud):

- a) Student  
 b) Unemployed  
 c) Self-employed  
 d) Casual laborer  
 e) Employed  
 f) Housewife

Or: DK / RF / MI [strike across for NA]

Or: DK / RF / MI [strike across for NA]

**102)** What is the highest level of education you have completed?

q:4ay

Mark one:

- a) None  
 b) Standard 1-6  
 c) Standard 7  
 d) Form 1-4  
 e) Form 5 or higher

Or: DK / RF / MI [strike across for NA]

**103)** Are you married?

q:4j7

Mark one:

- a) Yes  
 b) No

Or: DK / RF / MI [strike across for NA]

**104)** IF NO:  
What is your marital status?

q:4ac

Mark one (READ responses aloud):

- a) Widowed  
 b) Divorced / separated  
 c) Never married

Or: DK / RF / MI [strike across for NA]

**105)** Do you have any biological children?

q:4ed

Mark one:

- a) Yes  
 b) No

Or: DK / RF / MI [strike across for NA]

**106)** IF YES:  
How many years old is your youngest child?

q:4eg

# \_\_\_\_\_

Or: DK / RF / MI [strike across for NA]

**107)** Would you like to have (a/another) child, or would you prefer not to have any (more) children?

q:4ht

Mark one:

- a) Have (a/another) child  
 b) No more / none  
 c) Says she can't get pregnant

Or: DK / RF / MI [strike across for NA]

Continue on next page →

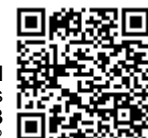

DCE I  
 Sociodemographics  
 Page 12 of 13

ef029f81b850d61fd9c40c8040fff17f522d9402

q:4fl **Socioeconomics****108)** TYPE OF RESIDENCE

q:4i7

Mark one:

- a) Room(s)  
 b) House  
 c) Apartment  
 d) Other \_\_\_\_\_ 4

Or: DK / RF / MI [strike across for NA]

**109)** MAIN MATERIAL OF THE FLOOR

q:4hu

Mark one:

- a) Earth  
 b) Cement  
 c) Other

Or: DK / RF / MI [strike across for NA]

**110)** Does your household have:

q:4dq

Mark all that apply (read ONE-by-ONE):

- a) Electricity  
 b) A radio?  
 c) A television?  
 d) A mobile telephone?  
 e) An iron?  
 f) A refrigerator?  
 g) A motorcycle or motor scooter?  
 h) A car or truck?  
 i) A bank account?  
 j) Tap water?  
 k) None of the above

Or: DK / RF / MI [strike across for NA]

**111)** What kind of toilet facility do members of your household usually use?

q:4hv

Mark one (READ responses aloud):

- a) Flush toilet  
 b) Pit latrine  
 c) Other

Or: DK / RF / MI [strike across for NA]

**112)** What is the tenure status of the main residence?

q:4fz

Mark one (READ responses aloud):

- a) Owner occupied  
 b) Employer owned  
 c) Rented  
 d) Other \_\_\_\_\_ 4

Or: DK / RF / MI [strike across for NA]

**113)** Do you watch television ...

q:4f5

Mark one (READ responses aloud):

- a) Almost every day  
 b) At least once a week  
 c) Less than once a week  
 d) Not at all

Or: DK / RF / MI [strike across for NA]

**114)** Are you currently covered by any health insurance?

q:4eb

Mark one:

- a) Yes  
 b) No

Or: DK / RF / MI [strike across for NA]

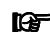

Thank you very much.

q:4jg

**115)** TODAY'S DATE:

q:4jd

Year: \_\_\_\_ / Month: \_\_\_\_ / Day: \_\_\_\_

Or: DK / RF / MI [strike across for NA]

**116)** TIME:

q:4je

\_\_\_\_\_ 4

Or: DK / RF / MI [strike across for NA]

**117)** INTERVIEWER SIGNATURE:

q:4jf

\_\_\_\_\_ 4

Or: DK / RF / MI [strike across for NA]

**End of survey.**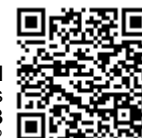

DCE I  
 Socioeconomics  
 Page 13 of 13

ef029f81b850d61fd9c40c8040fff17f522d9402
